# Supplementary material for: Plasma Concentrations of Long Chain N-3 Fatty Acids in Early and Mid-Pregnancy and Risk of Early Preterm Birth
Source: PubMed Central journal article supplement — eBioMedicine. 2018 Aug 3;35:325–33. doi: 10.1016/j.ebiom.2018.07.009 (PMC6156714; doi:10.1016/j.ebiom.2018.07.009), 2018-08-03

**1st sample, adjusted for covariates**

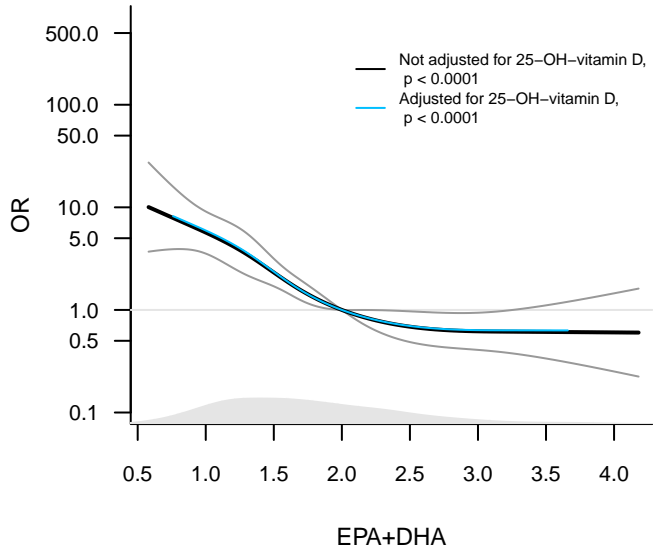

**2nd sample, adjusted for covariates**

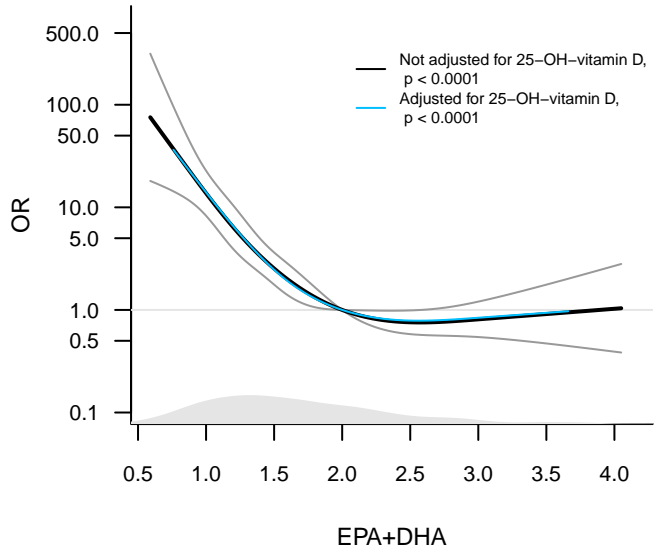

**Mean of 1st and 2nd sample, adjusted for covariates**

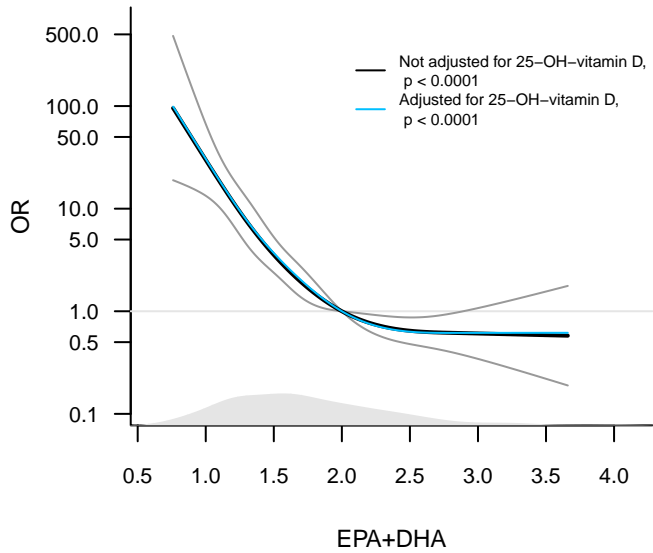

**Concordent quintiles, adjusted for covariates**

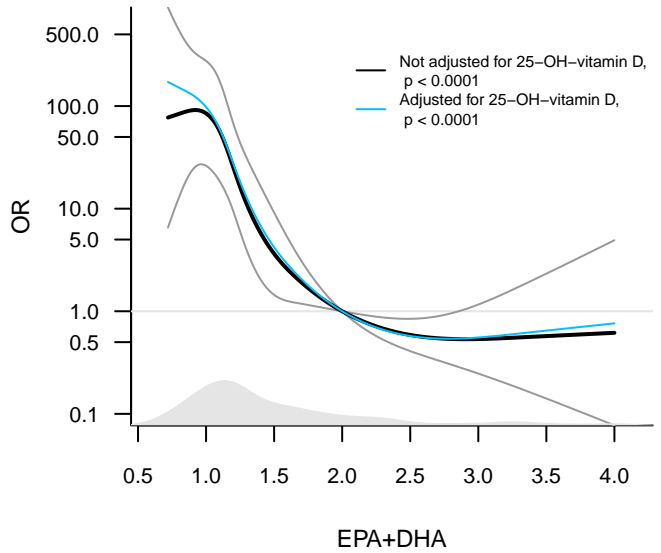

Supplement: mmc1.pdf [file mmc1.pdf]
